# Supplementary material for: Top-Down, Knowledge-Based Genetic Reduction of Yeast Central Carbon Metabolism
Source: PubMed Central journal article supplement (PMC9600970; doi:10.1128/mbio.02970-21), 2022-09-21

## Figure S1 - Growth rate of the *OAC1* deletion mutant

Maximum specific growth rate of *S. cerevisiae* CEN.PK113-7D (naïve reference strain) and the *OAC1* deletion mutant, *S. cerevisiae* IMK588, tested in shake flasks on selective SMD medium. Growth rates represent the average and standard deviation of two biological duplicates. \* IMK588 had a 26% slower growth rate with respect to CEN.PK113-7D (two-tailed paired homoscedastic t-test  $p < 0.05$ ).

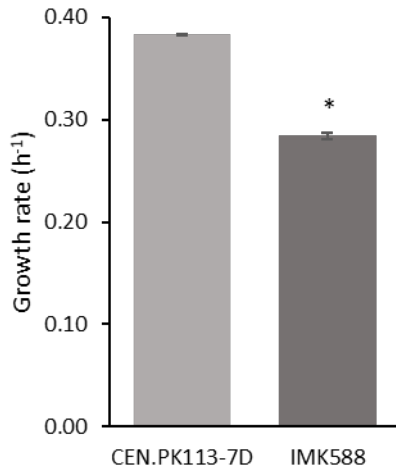

Supplement: mbio.02970-21-s0001.pdf [file mbio.02970-21-s0001.pdf]
