# Supplementary material for: Top-Down, Knowledge-Based Genetic Reduction of Yeast Central Carbon Metabolism
Source: PubMed Central journal article supplement (PMC9600970; doi:10.1128/mbio.02970-21), 2022-09-21
Supplement: mbio.02970-21-s0004.pdf [file mbio.02970-21-s0004.pdf]

Table S1 Genetic characteristics of the paralogs considered for deletion

Genes that were deleted in this study are marked in red. Protein similarity was based on global alignment using BLOSUM62 of the translated genes of the *S. cerevisiae* CEN.PK113-7D genome sequence (Salazar *et al.* 2017). WGD pairs are indicated (Byrne and Wolfe 2005).

| Pathway                           | Gene                                                                  | % Protein Similarity                                 | Type of duplication   |
|-----------------------------------|-----------------------------------------------------------------------|------------------------------------------------------|-----------------------|
| Pentose phosphate pathway         | <i>GND1</i> (YHR183W) / <i>GND2</i> (YGR256W)                         | 87%                                                  | WGD                   |
|                                   | <i>TKL1</i> (YPR074C) / <i>TKL2</i> (YBR117C)                         | 71%                                                  | WGD                   |
|                                   | <i>SOL3</i> (YHR163W) / <i>SOL4</i> (YGR248W)                         | 47%                                                  | WGD                   |
|                                   | <i>TAL1</i> (YLR354C) / <i>NQM1</i> (YGR043C)                         | 68%                                                  | WGD                   |
| TCA cycle + anaplerotic reactions | <i>PYC1</i> (YGL062W) / <i>PYC2</i> (YBR218C)                         | 92%                                                  | WGD                   |
|                                   | <i>SDH1</i> (YKL148C) / <i>SDH1b</i> (YJL045W)                        | 84%                                                  | WGD                   |
|                                   | <i>SDH3</i> (YKL141W) / <i>SHH3</i> (YMR118C)                         | 42%                                                  | WGD                   |
|                                   | <i>SDH4</i> (YDR178W) / <i>SHH4</i> (YLR164W)                         | 47%                                                  | WGD                   |
|                                   | <i>CIT1</i> (YNR001C) / <i>CIT2</i> (YCR005C) / <i>CIT3</i> (YPR001W) | <i>CIT1/CIT2</i> =75%<br><b><i>CIT1/CIT3</i>=42%</b> | <i>CIT1/CIT2</i> =WGD |
| Mitochondrial transporters        | <i>AAC1</i> (YMR056C) / <i>AAC2</i> (YBL030C) / <i>AAC3</i> (YBR085W) | <i>AAC2/AAC1</i> =73%<br><i>AAC2/AAC3</i> =87%       | <i>AAC2/AAC3</i> =WGD |
|                                   | <i>SAL1</i> (YNL083W)                                                 |                                                      |                       |
|                                   | <i>MPC1</i> (YGL080W) / <i>MPC2</i> (YHR162W) / <i>MPC3</i> (YGR243W) | <b><i>MPC2/MPC3</i>=65%</b><br><i>MPC2/MPC1</i> =25% | <i>MPC2/MPC3</i> =WGD |
|                                   | <i>CTP1</i> (YBR291C)                                                 |                                                      |                       |
|                                   | <i>ODC1</i> (YPL134C) / <i>ODC2</i> (YOR222W)                         | 61%                                                  | WGD                   |
|                                   | <i>NDT1</i> (YIL006W) / <i>NDT2</i> (YEL006W)                         | 51%                                                  | WGD                   |
|                                   | <i>OSM1</i> (YJR051W) / <i>FRDS1</i> (YEL047C)                        | 59%                                                  | WGD                   |
| Glyoxylate and TCA cycle          | <i>IDP1</i> (YDL066W) / <i>IDP2</i> (YLR174W) / <i>IDP3</i> (YNL009W) | <i>IDP1/IDP3</i> =65%<br><i>IDP2/IDP3</i> =73%       | <i>IDP2/IDP3</i> =WGD |

|                             |                                               |     |     |
|-----------------------------|-----------------------------------------------|-----|-----|
| <b>acetyl-CoA synthesis</b> | <i>ALD2</i> (YMR170C) / <i>ALD3</i> (YMR169C) | 91% |     |
| <b>Glycerol synthesis</b>   | <i>GPD1</i> (YDL022W) / <i>GPD2</i> (YOL059W) | 72% | WGD |
|                             | <i>GPP1</i> (YIL053W) / <i>GPP2</i> (YER062C) | 92% | WGD |

Salazar AN, Gorter de Vries AR, van den Broek M et al. Nanopore sequencing enables near-complete *de novo* assembly of *Saccharomyces cerevisiae* reference strain CEN.PK113-7D. FEMS Yeast Res 2017;17.

Byrne KP, Wolfe KH. The Yeast Gene Order Browser: combining curated homology and syntenic context reveals gene fate in polyploid species. Genome Res 2005;15: 1456-61.
