# Supplementary material for: Top-Down, Knowledge-Based Genetic Reduction of Yeast Central Carbon Metabolism
Source: PubMed Central journal article supplement (PMC9600970; doi:10.1128/mbio.02970-21), 2022-09-21
Supplement: mbio.02970-21-s0005.pdf [file mbio.02970-21-s0005.pdf]

## Table S2 - Mitochondrial carrier proteins

A list of 35 mitochondrial transporter identified by Palmieri *et al.* (1996) and reviewed by Palmieri and Monné (2016). In this list the systematic name, standard name, importance in this study and the function of the gene encoding for mitochondrial transporters are listed. NA, not assigned. \**CRC1* was not considered as involved in the CCM since there is no carnitine supplied to the cultures in this study and thus the carnitine shuttle is not active.

| Systematic name | Standard name | Considered as involved in CCM? | Function                                                                                                                                                                                       |
|-----------------|---------------|--------------------------------|------------------------------------------------------------------------------------------------------------------------------------------------------------------------------------------------|
| YIL006w         | <i>NDT1</i>   | YES                            | Mitochondrial NAD <sup>+</sup> transporter                                                                                                                                                     |
| YEL006w         | <i>NDT2</i>   | YES                            | Mitochondrial NAD <sup>+</sup> transporter                                                                                                                                                     |
| YIL134w         | <i>FLX1</i>   | YES                            | Mitochondrial FAD transporter                                                                                                                                                                  |
| YBR192w         | <i>RIM2</i>   | NO                             | Mitochondrial pyrimidine nucleotide transporter                                                                                                                                                |
| YDL119c         | <i>HEM25</i>  | NO                             | Mitochondrial glycine transporter                                                                                                                                                              |
| YNL003c         | <i>SAM5</i>   | NO                             | S-adenosylmethionine transporter of the mitochondrial inner membrane                                                                                                                           |
| YKR052c         | <i>MRS4</i>   | NO                             | Iron transporter of the mitochondrial carrier family (may transport other cations)                                                                                                             |
| YJL133w         | <i>MRS3</i>   | NO                             | Iron transporter of the mitochondrial carrier family (May transport other cations)                                                                                                             |
| YGR257c         | <i>MTM1</i>   | NO                             | pyridoxal 5'-phosphate (PLP) transporter                                                                                                                                                       |
| YER053c         | <i>PIC2</i>   | NO                             | Mitochondrial copper and phosphate carrier                                                                                                                                                     |
| YJR077c         | <i>MIR1</i>   | NO                             | Mitochondrial phosphate carrier                                                                                                                                                                |
| YOR130c         | <i>ORT1</i>   | NO                             | Ornithine transporter of the mitochondrial inner membrane (ornithine-proton exchange or ornithine-ornithine exchange also transports arginine and lysine)                                      |
| YOR100c         | <i>CRC1</i>   | NO*                            | Mitochondrial inner membrane carnitine transporter. Transports carnitine, acetylcarnitin and propionylcarnitine .                                                                              |
| YBR104w         | <i>YMC2</i>   | NO                             | Putative mitochondrial inner membrane transporter. Proposed role in oleate metabolism and glutamate biosynthesis.                                                                              |
| YPR058w         | <i>YMC1</i>   | NO                             | Secondary mitochondrial inner membrane glycine transporter; required with HEM25 for the transport of glycine into mitochondria. Proposed role in oleate metabolism and glutamate biosynthesis. |
| YPL134c         | <i>ODC1</i>   | YES                            | 2-oxodicarboxylate transporter (transports 2-oxoglutarate and oxodipate <sup>+</sup> corresponding dicarboxylates and malate by counterexchange)                                               |
| YOR222w         | <i>ODC2</i>   | YES                            | 2-oxodicarboxylate transporter (transports oxoglutarate and oxodipate <sup>+</sup> corresponding dicarboxylates and malate by counterexchange)                                                 |
| YPR021c         | <i>AGC1</i>   | NO                             | Mitochondrial amino acid transporter (transport aspartate and glutamate in uniport as well as in exchange mechanism)                                                                           |
| YJR095w         | <i>SFC1</i>   | YES                            | Mitochondrial succinate-fumarate counter exchange transporter (fumerate to cytosol, succinate to mitochondria)                                                                                 |
| YBR291c         | <i>CTP1</i>   | YES                            | Mitochondrial inner membrane citrate transporter                                                                                                                                               |
| YFR045w         | NA            | NO                             | Putative mitochondrial transport protein; null mutant is viable                                                                                                                                |
| YMR241w         | <i>YHM2</i>   | YES                            | Citrate and oxoglutarate carrier protein (Citrate exported and oxoglutarate imported) (oxaloacetate, succinate and fumerate to a lesser extend)                                                |

|                |             |     |                                                                                                                                                                  |
|----------------|-------------|-----|------------------------------------------------------------------------------------------------------------------------------------------------------------------|
| <b>YLR348c</b> | <i>DIC1</i> | YES | Mitochondrial dicarboxylate carrier (transports malate, succinate, malonate, inorganic phosphate by counter exchange mechanism. Also sulphate, thiosulphate)     |
| <b>YKL120w</b> | <i>OAC1</i> | YES | Transports oxaloacetate and sulfate (unidirectional+counterexchange)                                                                                             |
| <b>YDL198c</b> | <i>GGC1</i> | NO  | Mitochondrial GTP/GDP exchange transporter, essential for mitochondrial genome maintenance, has a role in mitochondrial iron transport                           |
| <b>YGR096w</b> | <i>TPC1</i> | YES | Mediates uptake of the essential cofactor thiamine pyrophosphate (ThPP) into mitochondria                                                                        |
| <b>YMR056c</b> | <i>AAC1</i> | YES | Mitochondrial inner membrane ADP/ATP translocator                                                                                                                |
| <b>YBL030c</b> | <i>AAC2</i> | YES | Mitochondrial inner membrane ADP/ATP translocator                                                                                                                |
| <b>YBR085w</b> | <i>AAC3</i> | YES | Mitochondrial inner membrane ADP/ATP translocator                                                                                                                |
| <b>YHR002w</b> | <i>LEU5</i> | YES | Involved in the accumulation of CoA in the mitochondrial matrix                                                                                                  |
| <b>YPR011c</b> | NA          | NO  | Putative 5'-phosphosulfate (APS) and 3'-phospho-adenosine 5'-phosphosulfate (PAPS) transporter. Not enough information on the function to include in this study. |
| <b>YNL083w</b> | <i>SAL1</i> | YES | ADP/ATP transporter (activity of either Sal1p or Pet9p is critical for viability)                                                                                |
| <b>YGL080w</b> | <i>MPC1</i> | YES | Conserved subunit of mitochondrial pyruvate carrier (MPC)                                                                                                        |
| <b>YHR162w</b> | <i>MPC2</i> | YES | Highly conserved subunit of the mitochondrial pyruvate carrier (MPC)                                                                                             |
| <b>YGR243w</b> | <i>MPC3</i> | YES | Highly conserved subunit of the mitochondrial pyruvate carrier (MPC)                                                                                             |
| <b>YMR166C</b> | <i>MME1</i> | NO  | Mitochondrial inner membrane transporter that exports magnesium                                                                                                  |

Palmieri F, Monné M. Discoveries, metabolic roles and diseases of mitochondrial carriers: A review. *Biochim Biophys Acta* 2016;1863: 2362-78.

Palmieri L, Palmieri F, Runswick MJ et al. Identification by bacterial expression and functional reconstitution of the yeast genomic sequence encoding the mitochondrial dicarboxylate carrier protein. *FEBS Lett* 1996;399: 299-302.
