# Supplementary material for: Top-Down, Knowledge-Based Genetic Reduction of Yeast Central Carbon Metabolism
Source: PubMed Central journal article supplement (PMC9600970; doi:10.1128/mbio.02970-21), 2022-09-21
Supplement: mbio.02970-21-s0006.pdf [file mbio.02970-21-s0006.pdf]

Table S3 - Strains

| Name<br>(Accession no.)     | Relevant genotype                                                                                                            | Reduced pathway                      | Origin                   |
|-----------------------------|------------------------------------------------------------------------------------------------------------------------------|--------------------------------------|--------------------------|
| <b>Unreduced background</b> |                                                                                                                              |                                      |                          |
| <b>CEN.PK113-7D</b>         | <i>MATa ura3-52 can1Δ::cas9-natNT2</i><br><i>TRP1 LEU2 HIS3</i>                                                              |                                      | (Entian and Kötter 2007) |
| <b>IMX581<br/>(Y40593)</b>  | <i>MATa ura3-52 can1Δ::cas9-natNT2 TRP1 LEU2</i><br><i>HIS3</i>                                                              |                                      | (Mans et al. 2015)       |
| <b>IMK588</b>               | <i>MATa URA3 HIS3 LEU2 TRP1 OAC1Δ::kanMX</i>                                                                                 |                                      | This study               |
| <b>IMK815</b>               | <i>MATa ura3-52 HIS3 LEU2 TRP1 can1Δ::cas9-natNT2 gnd2Δ tkl2Δ sol4Δ</i>                                                      |                                      | This study               |
| <b>IMX1592</b>              | <i>MATa ura3-52 HIS3 LEU2 TRP1 can1Δ::cas9-natNT2 gnd2Δ tkl2Δ sol4Δ nqm1Δ</i>                                                | Pentose phosphate pathway            | This study               |
| <b>IMX1694</b>              | <i>MATa ura3-52 can1Δ::cas9-natNT2 TRP1 LEU2</i><br><i>HIS3 pyc2Δ sdh1bΔ shh3Δ shh4Δ</i>                                     |                                      | This study               |
| <b>IMX1805</b>              | <i>MATa ura3-52 can1Δ::cas9-natNT2 TRP1 LEU2</i><br><i>HIS3 pyc2Δ sdh1bΔ shh3Δ shh4Δ cit3Δ</i>                               | Anaplerotic reaction and Krebs cycle | This study               |
| <b>IMX2230</b>              | <i>MATa ura3-52 HIS3 LEU2 TRP1 MAL2-8c SUC2</i><br><i>can1::CAS9-nat odc1Δ odc2Δ ndt2Δ ctp1Δ</i>                             |                                      | This study               |
| <b>IMX2360</b>              | <i>MATa ura3-52 HIS3 LEU2 TRP1 MAL2-8c SUC2</i><br><i>can1::CAS9-nat aac1Δ aac3Δ sal1Δ mpc3Δ</i>                             |                                      | This study               |
| <b>IMX2391</b>              | <i>MATa ura3-52 HIS3 LEU2 TRP1 MAL2-8c SUC2</i><br><i>can1::CAS9-nat odc2Δ</i>                                               |                                      | This study               |
| <b>IMX2396</b>              | <i>MATa ura3-52 HIS3 LEU2 TRP1 MAL2-8c SUC2</i><br><i>can1::CAS9-nat ctp1Δ odc1Δ odc2Δ</i>                                   |                                      | This study               |
| <b>IMX2397</b>              | <i>MATa ura3-52 HIS3 LEU2 TRP1 MAL2-8c SUC2</i><br><i>can1::CAS9-nat aac1Δ aac3Δ mpc3Δ sal1Δ</i><br><i>odc2Δ</i>             |                                      | This study               |
| <b>IMX2404</b>              | <i>MATa ura3-52 HIS3 LEU2 TRP1 MAL2-8c SUC2</i><br><i>can1::CAS9-nat ctp1Δ odc1Δ ndt2Δ</i>                                   |                                      | This study               |
| <b>IMX2408</b>              | <i>MATa ura3-52 HIS3 LEU2 TRP1 MAL2-8c SUC2</i><br><i>can1::CAS9-nat aac1Δ aac3Δ mpc3Δ sal1Δ</i><br><i>ctp1Δ odc1Δ ndt2Δ</i> | Mitochondrial transporters           | This study               |
| <b>IMX2416</b>              | <i>MATa ura3-52 HIS3 LEU2 TRP1 MAL2-8c SUC2</i><br><i>can1::CAS9-nat aac1Δ aac3Δ mpc3Δ sal1Δ</i><br><i>ctp1Δ odc1Δ odc2Δ</i> |                                      | This study               |
| <b>IMX2508</b>              | <i>MATa ura3-52 HIS3 LEU2 TRP1 MAL2-8c SUC2</i><br><i>can1::CAS9-nat ctp1Δ</i>                                               |                                      | This study               |
| <b>IMX2527</b>              | <i>MATa ura3-52 HIS3 LEU2 TRP1 MAL2-8c SUC2</i><br><i>can1::CAS9-nat odc1Δ odc2Δ</i>                                         |                                      | This study               |
| <b>IMX2466</b>              | <i>MATa ura3-52 HIS3 LEU2 TRP1 MAL2-8c SUC2</i><br><i>can1::CAS9-nat frds1Δ</i>                                              | Fumarate reductase                   | This study               |

|                           |                                                                                                                                                                                                                          |                                      |                               |
|---------------------------|--------------------------------------------------------------------------------------------------------------------------------------------------------------------------------------------------------------------------|--------------------------------------|-------------------------------|
| <b>IMX2467</b>            | <i>MATa ura3-52 HIS3 LEU2 TRP1 MAL2-8c SUC2 can1::CAS9-nat idp1Δ</i>                                                                                                                                                     |                                      | This study                    |
| <b>IMX2468</b>            | <i>MATa ura3-52 HIS3 LEU2 TRP1 MAL2-8c SUC2 can1::CAS9-nat idp2Δ</i>                                                                                                                                                     |                                      | This study                    |
| <b>IMX2469</b>            | <i>MATa ura3-52 HIS3 LEU2 TRP1 MAL2-8c SUC2 can1::CAS9-nat idp1Δ idp2Δ</i>                                                                                                                                               | Glyoxylate cycle                     | This study                    |
| <b>IMX2470</b>            | <i>MATa ura3-52 HIS3 LEU2 TRP1 MAL2-8c SUC2 can1::CAS9-nat frds1Δ idp1Δ idp2Δ</i>                                                                                                                                        |                                      | This study                    |
| <b>IMX2509</b>            | <i>MATa ura3-52 HIS3 LEU2 TRP1 MAL2-8c SUC2 can1::CAS9-nat ald3Δ gpd1Δ gpp2Δ</i>                                                                                                                                         |                                      | This study                    |
| <b>IMX2510</b>            | <i>MATa ura3-52 HIS3 LEU2 TRP1 MAL2-8c SUC2 can1::CAS9-nat ald3Δ</i>                                                                                                                                                     | Acetyl-CoA synthesis                 | This study                    |
| <b>IMX2512</b>            | <i>MATa ura3-52 HIS3 LEU2 TRP1 MAL2-8c SUC2 can1::CAS9-nat ald3Δ gpd1Δ</i>                                                                                                                                               |                                      | This study                    |
| <b>IMX2513</b>            | <i>MATa ura3-52 HIS3 LEU2 TRP1 MAL2-8c SUC2 can1::CAS9-nat ald3Δ gpp2Δ</i>                                                                                                                                               |                                      | This study                    |
| <b>IMX2612</b>            | <i>MATa ura3-52 HIS3 LEU2 TRP1 MAL2-8c SUC2 can1::CAS9-nat gpd1Δ gpp2Δ</i>                                                                                                                                               | Glycerol synthesis                   | This study                    |
| <b>Reduced background</b> |                                                                                                                                                                                                                          |                                      |                               |
| <b>IMX370</b>             | <i>MATa ura3-52 his3-1 leu2-3,112 MAL2-8c SUC2 glk1::HIS5, hxx1::LEU2, tdh1, tdh2::AB, gpm2::LoxP, gpm3, eno1, pyk2, pdc5, pdc6, adh2, adh5, adh4</i>                                                                    | Glycolysis                           | (Solis-Escalante et al. 2015) |
| <b>IMX1331 (MG)</b>       | <i>MATa ura3-52 his3-1 leu2-3,112 MAL2-8c SUC2 glk1::Sphis5 hxx1::KILEU2 tdh1 tdh2 gpm2 gpm3 eno1 pyk2 pdc5 pdc6 adh2 adh5 adh4 can1Δ::cas9-natNT2</i>                                                                   | Glycolysis                           | This study                    |
| <b>IMK814</b>             | <i>MATa ura3-52 his3-1 leu2-3,112 MAL2-8c SUC2 glk1::Sphis5 hxx1::KILEU2 tdh1Δ tdh2Δ gpm2Δ gpm3Δ eno1Δ pyk2Δ pdc5Δ pdc6Δ adh2Δ adh5Δ adh4Δ can1Δ::cas9-natNT2 gnd2Δ tkl2Δ sol4Δ</i>                                      |                                      | This study                    |
| <b>IMX1591 (CCMin 1)</b>  | <i>MATa ura3-52 his3-1 leu2-3,112 MAL2-8c SUC2 glk1::Sphis5 hxx1::KILEU2 tdh1Δ tdh2Δ gpm2Δ gpm3Δ eno1Δ pyk2Δ pdc5Δ pdc6Δ adh2Δ adh5Δ adh4Δ can1Δ::cas9-natNT2 gnd2Δ tkl2Δ sol4Δ nqm1Δ</i>                                | Pentose phosphate pathway            | This study                    |
| <b>IMX1713</b>            | <i>MATa ura3-52 his3-1 leu2-3,112 MAL2-8c SUC2 glk1::Sphis5 hxx1::KILEU2 tdh1Δ tdh2Δ gpm2Δ gpm3Δ eno1Δ pyk2Δ pdc5Δ pdc6Δ adh2Δ adh5Δ adh4Δ can1Δ::cas9-natNT2 gnd2Δ tkl2Δ sol4Δ nqm1Δ pyc2Δ sdh1bΔ shh3Δ shh4Δ</i>       |                                      | This study                    |
| <b>IMX1806 (CCMin 2)</b>  | <i>MATa ura3-52 his3-1 leu2-3,112 MAL2-8c SUC2 glk1::Sphis5 hxx1::KILEU2 tdh1Δ tdh2Δ gpm2Δ gpm3Δ eno1Δ pyk2Δ pdc5Δ pdc6Δ adh2Δ adh5Δ adh4Δ can1Δ::cas9-natNT2 gnd2Δ tkl2Δ sol4Δ nqm1Δ pyc2Δ sdh1bΔ shh3Δ shh4Δ cit3Δ</i> | Anaplerotic reaction and Krebs cycle | This study                    |

|                          |                                                                                                                                                                                                                                                                             |                            |            |
|--------------------------|-----------------------------------------------------------------------------------------------------------------------------------------------------------------------------------------------------------------------------------------------------------------------------|----------------------------|------------|
| <b>IMX1984</b>           | <i>MATa ura3-52 his3-1 leu2-3,112 MAL2-8c SUC2 glk1::Sphis5 hxx1::KILEU2 tdh1Δ tdh2Δ gpm2Δ gpm3Δ eno1Δ pyk2Δ pdc5Δ pdc6Δ adh2Δ adh5Δ adh4Δ can1Δ::cas9-natNT2 gnd2Δ tkl2Δ sol4Δ nqm1Δ pyc2Δ sdh1bΔ shh3Δ shh4Δ cit3Δ aac1Δ aac3Δ sal1Δ mpc3Δ</i>                            |                            | This study |
| <b>IMX2231</b>           | <i>MATa ura3-52 his3-1 leu2-3,112 MAL2-8c SUC2 glk1::Sphis5 hxx1::KILEU2 tdh1Δ tdh2Δ gpm2Δ gpm3Δ eno1Δ pyk2Δ pdc5Δ pdc6Δ adh2Δ adh5Δ adh4Δ can1Δ::cas9-natNT2 gnd2Δ tkl2Δ sol4Δ nqm1Δ pyc2Δ sdh1bΔ shh3Δ shh4Δ cit3Δ aac1Δ aac3Δ sal1Δ mpc3Δ odc1Δ odc2Δ ndt2Δ ctp1Δ</i>    |                            | This study |
| <b>IMX2394</b>           | <i>MATa ura3-52 his3-1 leu2-3,112 MAL2-8c SUC2 glk1::Sphis5 hxx1::KILEU2 tdh1Δ tdh2Δ gpm2Δ gpm3Δ eno1Δ pyk2Δ pdc5Δ pdc6Δ adh2Δ adh5Δ adh4Δ can1Δ::cas9-natNT2 gnd2Δ tkl2Δ sol4Δ nqm1Δ pyc2Δ sdh1bΔ shh3Δ shh4Δ cit3Δ aac1Δ aac3Δ sal1Δ mpc3Δ odc2Δ</i>                      |                            | This study |
| <b>IMX2405</b>           | <i>MATa ura3-52 his3-1 leu2-3,112 MAL2-8c SUC2 glk1::Sphis5 hxx1::KILEU2 tdh1Δ tdh2Δ gpm2Δ gpm3Δ eno1Δ pyk2Δ pdc5Δ pdc6Δ adh2Δ adh5Δ adh4Δ can1Δ::cas9-natNT2 gnd2Δ tkl2Δ sol4Δ nqm1Δ pyc2Δ sdh1bΔ shh3Δ shh4Δ cit3Δ aac1Δ aac3Δ sal1Δ mpc3Δ ctp1Δ odc1Δ</i>                |                            | This study |
| <b>IMX2406</b>           | <i>MATa ura3-52 his3-1 leu2-3,112 MAL2-8c SUC2 glk1::Sphis5 hxx1::KILEU2 tdh1Δ tdh2Δ gpm2Δ gpm3Δ eno1Δ pyk2Δ pdc5Δ pdc6Δ adh2Δ adh5Δ adh4Δ can1Δ::cas9-natNT2 gnd2Δ tkl2Δ sol4Δ nqm1Δ pyc2Δ sdh1bΔ shh3Δ shh4Δ cit3Δ aac1Δ aac3Δ sal1Δ mpc3Δ ctp1Δ odc1Δ odc2Δ</i>          |                            | This study |
| <b>IMX2407 (CCMin 3)</b> | <i>MATa ura3-52 his3-1 leu2-3,112 MAL2-8c SUC2 glk1Δ::Sphis5 hxx1Δ::KILEU2 tdh1Δ tdh2Δ gpm2Δ gpm3Δ eno1Δ pyk2Δ pdc5Δ pdc6Δ adh2Δ adh5Δ adh4Δ can1Δ::cas9-natNT2 gnd2Δ tkl2Δ sol4Δ nqm1Δ pyc2Δ sdh1bΔ shh3Δ shh4Δ cit3Δ aac1Δ aac3Δ sal1Δ mpc3Δ ctp1Δ odc1Δ ndt2Δ</i>        | Mitochondrial transporters | This study |
| <b>IMX2471</b>           | <i>MATa ura3-52 his3-1 leu2-3,112 MAL2-8c SUC2 glk1Δ::Sphis5 hxx1Δ::KILEU2 tdh1Δ tdh2Δ gpm2Δ gpm3Δ eno1Δ pyk2Δ pdc5Δ pdc6Δ adh2Δ adh5Δ adh4Δ can1Δ::cas9-natNT2 gnd2Δ tkl2Δ sol4Δ nqm1Δ pyc2Δ sdh1bΔ shh3Δ shh4Δ cit3Δ aac1Δ aac3Δ sal1Δ mpc3Δ ctp1Δ odc1Δ ndt2Δ frds1Δ</i> | Fumarate reductase         | This study |
| <b>IMX2472</b>           | <i>MATa ura3-52 his3-1 leu2-3,112 MAL2-8c SUC2 glk1Δ::Sphis5 hxx1Δ::KILEU2 tdh1Δ tdh2Δ gpm2Δ gpm3Δ eno1Δ pyk2Δ pdc5Δ pdc6Δ adh2Δ adh5Δ adh4Δ can1Δ::cas9-natNT2 gnd2Δ</i>                                                                                                   |                            | This study |

|                          |                                                                                                                                                                                                                                                                                                           |                      |            |
|--------------------------|-----------------------------------------------------------------------------------------------------------------------------------------------------------------------------------------------------------------------------------------------------------------------------------------------------------|----------------------|------------|
|                          | <i>tkl2Δ sol4Δ nqm1Δ pyc2Δ sdh1bΔ shh3Δ shh4Δ cit3Δ aac1Δ aac3Δ sal1Δ mpc3Δ ctp1Δ odc1Δ ndt2Δ idp1Δ</i>                                                                                                                                                                                                   |                      |            |
| <b>IMX2473</b>           | <i>MATa ura3-52 his3-1 leu2-3,112 MAL2-8c SUC2 glk1Δ::Sphis5 hxx1Δ::KILEU2 tdh1Δ tdh2Δ gpm2Δ gpm3Δ eno1Δ pyk2Δ pdc5Δ pdc6Δ adh2Δ adh5Δ adh4Δ can1Δ::cas9-natNT2 gnd2Δ tkl2Δ sol4Δ nqm1Δ pyc2Δ sdh1bΔ shh3Δ shh4Δ cit3Δ aac1Δ aac3Δ sal1Δ mpc3Δ ctp1Δ odc1Δ ndt2Δ idp2Δ</i>                                |                      | This study |
| <b>IMX2474</b>           | <i>MATa ura3-52 his3-1 leu2-3,112 MAL2-8c SUC2 glk1Δ::Sphis5 hxx1Δ::KILEU2 tdh1Δ tdh2Δ gpm2Δ gpm3Δ eno1Δ pyk2Δ pdc5Δ pdc6Δ adh2Δ adh5Δ adh4Δ can1Δ::cas9-natNT2 gnd2Δ tkl2Δ sol4Δ nqm1Δ pyc2Δ sdh1bΔ shh3Δ shh4Δ cit3Δ aac1Δ aac3Δ sal1Δ mpc3Δ ctp1Δ odc1Δ ndt2Δ idp1Δ idp2Δ</i>                          |                      | This study |
| <b>IMX2475 (CCMin 4)</b> | <i>MATa ura3-52 his3-1 leu2-3,112 MAL2-8c SUC2 glk1Δ::Sphis5 hxx1Δ::KILEU2 tdh1Δ tdh2Δ gpm2Δ gpm3Δ eno1Δ pyk2Δ pdc5Δ pdc6Δ adh2Δ adh5Δ adh4Δ can1Δ::cas9-natNT2 gnd2Δ tkl2Δ sol4Δ nqm1Δ pyc2Δ sdh1bΔ shh3Δ shh4Δ cit3Δ aac1Δ aac3Δ sal1Δ mpc3Δ ctp1Δ odc1Δ ndt2Δ frds1Δ idp1Δ idp2Δ</i>                   | Glyoxylate cycle     | This study |
| <b>IMX2511</b>           | <i>MATa ura3-52 his3-1 leu2-3,112 MAL2-8c SUC2 glk1Δ::Sphis5 hxx1Δ::KILEU2 tdh1Δ tdh2Δ gpm2Δ gpm3Δ eno1Δ pyk2Δ pdc5Δ pdc6Δ adh2Δ adh5Δ adh4Δ can1Δ::cas9-natNT2 gnd2Δ tkl2Δ sol4Δ nqm1Δ pyc2Δ sdh1bΔ shh3Δ shh4Δ cit3Δ aac1Δ aac3Δ sal1Δ mpc3Δ ctp1Δ odc1Δ ndt2Δ frds1Δ idp1Δ idp2Δ ald3Δ</i>             | Acetyl-Coa synthesis | This study |
| <b>IMX2519 (CCMin 5)</b> | <i>MATa ura3-52 his3-1 leu2-3,112 MAL2-8c SUC2 glk1Δ::Sphis5 hxx1Δ::KILEU2 tdh1Δ tdh2Δ gpm2Δ gpm3Δ eno1Δ pyk2Δ pdc5Δ pdc6Δ adh2Δ adh5Δ adh4Δ can1Δ::cas9-natNT2 gnd2Δ tkl2Δ sol4Δ nqm1Δ pyc2Δ sdh1bΔ shh3Δ shh4Δ cit3Δ aac1Δ aac3Δ sal1Δ mpc3Δ ctp1Δ odc1Δ ndt2Δ frds1Δ idp1Δ idp2Δ ald3Δ gpd1Δ gpp2Δ</i> | Glycerol synthesis   | This study |
| <b>IMX2520</b>           | <i>MATa ura3-52 his3-1 leu2-3,112 MAL2-8c SUC2 glk1Δ::Sphis5 hxx1Δ::KILEU2 tdh1Δ tdh2Δ gpm2Δ gpm3Δ eno1Δ pyk2Δ pdc5Δ pdc6Δ adh2Δ adh5Δ adh4Δ can1Δ::cas9-natNT2 gnd2Δ tkl2Δ sol4Δ nqm1Δ pyc2Δ sdh1bΔ shh3Δ shh4Δ cit3Δ aac1Δ aac3Δ sal1Δ mpc3Δ ctp1Δ odc1Δ ndt2Δ frds1Δ idp1Δ idp2Δ ald3Δ gpd1Δ</i>       |                      | This study |
| <b>IMX2521</b>           | <i>MATa ura3-52 his3-1 leu2-3,112 MAL2-8c SUC2 glk1Δ::Sphis5 hxx1Δ::KILEU2 tdh1Δ tdh2Δ gpm2Δ gpm3Δ eno1Δ pyk2Δ pdc5Δ pdc6Δ</i>                                                                                                                                                                            |                      | This study |

|                                 |                                                                                                                                                                                                                                                                                                                                |            |
|---------------------------------|--------------------------------------------------------------------------------------------------------------------------------------------------------------------------------------------------------------------------------------------------------------------------------------------------------------------------------|------------|
|                                 | <i>adh2Δ adh5Δ adh4Δ can1Δ::cas9-natNT2 gnd2Δ tkl2Δ sol4Δ nqm1Δ pyc2Δ sdh1bΔ shh3Δ shh4Δ cit3Δ aac1Δ aac3Δ sal1Δ mpc3Δ ctp1Δ odc1Δ ndt2Δ frds1Δ idp1Δ idp2Δ ald3Δ gpp2Δ</i>                                                                                                                                                    |            |
| <b>IMX2538 (minimal strain)</b> | <i>MATa ura3-52 his3-1 leu2-3,112 MAL2-8c SUC2 glk1Δ::Sphis5 hxk1Δ::KILEU2 tdh1Δ tdh2Δ gpm2Δ gpm3Δ eno1Δ pyk2Δ pdc5Δ pdc6Δ adh2Δ adh5Δ adh4Δ can1Δ::cas9-natNT2 gnd2Δ tkl2Δ sol4Δ nqm1Δ pyc2Δ sdh1bΔ shh3Δ shh4Δ cit3Δ aac1Δ aac3Δ sal1Δ mpc3Δ ctp1Δ odc1Δ ndt2Δ frds1Δ idp1Δ idp2Δ ald3Δ gpd1Δ gpp2Δ::URA3</i>                | This study |
| <b>IMX2640</b>                  | <i>MATa ura3-52 his3-1 leu2-3,112 MAL2-8c SUC2 glk1::Sphis5 hxk1::KILEU2 tdh1Δ tdh2Δ gpm2Δ gpm3Δ eno1Δ pyk2Δ pdc5Δ pdc6Δ adh2Δ adh5Δ adh4Δ can1Δ::cas9-natNT2 gnd2Δ tkl2Δ sol4Δ nqm1Δ pyc2Δ sdh1bΔ shh3Δ shh4Δ cit3Δ aac1Δ aac3Δ sal1Δ mpc3Δ X2::pMPC3-MPC3-tMPC3</i>                                                          | This study |
| <b>IMX2641</b>                  | <i>MATa ura3-52 his3-1 leu2-3,112 MAL2-8c SUC2 glk1Δ::Sphis5 hxk1Δ::KILEU2 tdh1Δ tdh2Δ gpm2Δ gpm3Δ eno1Δ pyk2Δ pdc5Δ pdc6Δ adh2Δ adh5Δ adh4Δ can1Δ::cas9-natNT2 gnd2Δ tkl2Δ sol4Δ nqm1Δ pyc2Δ sdh1bΔ shh3Δ shh4Δ cit3Δ aac1Δ aac3Δ sal1Δ mpc3Δ ctp1Δ odc1Δ ndt2Δ frds1Δ idp1Δ idp2Δ ald3Δ gpd1Δ gpp2Δ X2::pMPC3-MPC3-tMPC3</i> | This study |

Mans R, van Rossum HM, Wijsman M et al. CRISPR/Cas9: a molecular Swiss army knife for simultaneous introduction of multiple genetic modifications in *Saccharomyces cerevisiae*. *FEMS Yeast Res* 2015;15: 1-15.

Entian K-D, Kötter P. 25 Yeast Genetic Strain and Plasmid Collections. In: Stansfield I, Stark MJR (eds.) *Methods in Microbiology* volume 36: Academic Press, 2007, 629-66.

Solis-Escalante D, Kuijpers NG, Barrajon-Simancas N et al. A minimal set of glycolytic genes reveals strong redundancies in *Saccharomyces cerevisiae* central metabolism. *Eukaryot Cell* 2015;14: 804-16.
