# Supplementary material for: Top-Down, Knowledge-Based Genetic Reduction of Yeast Central Carbon Metabolism
Source: PubMed Central journal article supplement (PMC9600970; doi:10.1128/mbio.02970-21), 2022-09-21
Supplement: mbio.02970-21-s0007.pdf [file mbio.02970-21-s0007.pdf]

Table S4 - Plasmids

N.A., not applicable.

| Name                         | Relevant characteristics                                         | Primer(s) used for gRNA | Origin                        |
|------------------------------|------------------------------------------------------------------|-------------------------|-------------------------------|
| <b>p414-TEF1p-Cas9-CYC1t</b> | CEN6/ARS ampR <i>TEF1p-Cas9-CYC1t</i>                            | N.A.                    | (DiCarlo <i>et al.</i> 2013)  |
| <b>pUG-natNT2</b>            | ampR <i>AgTEF1p-nat-AgTEF1t</i>                                  | N.A.                    | (de Kok <i>et al.</i> 2012)   |
| <b>pUG6</b>                  | ampR <i>AgTEF1p-kanMX-AgTEF1t</i>                                | N.A.                    | (Güldener <i>et al.</i> 1996) |
| <b>pMEL10</b>                | 2 $\mu$ m ampR <i>KIURA3</i> gRNA-CAN1.Y                         | N.A.                    | (Mans <i>et al.</i> 2015)     |
| <b>pMEL11</b>                | 2 $\mu$ m ampR <i>amdSYM</i> gRNA-CAN1.Y                         | N.A.                    | (Mans <i>et al.</i> 2015)     |
| <b>pROS10</b>                | 2 $\mu$ m ampR <i>URA3</i> gRNA-CAN1.Y gRNA-ADE2.Y               | N.A.                    | (Mans <i>et al.</i> 2015)     |
| <b>pROS11</b>                | 2 $\mu$ m ampR <i>amdSYM</i> gRNA-CAN1.Y gRNA-ADE2.Y             | N.A.                    | (Mans <i>et al.</i> 2015)     |
| <b>pUDR286</b>               | 2 $\mu$ m ampR <i>URA3</i> gRNA- <i>TKL2</i> gRNA- <i>SOL4</i>   | 9508 & 9503             | This study                    |
| <b>pUDR287</b>               | 2 $\mu$ m ampR <i>amdSYM</i> gRNA- <i>GND2</i>                   | 7231                    | This study                    |
| <b>pUDR351</b>               | 2 $\mu$ m ampR <i>URA3</i> gRNA- <i>CIT3</i>                     | 12537                   | This study                    |
| <b>pUDR353</b>               | 2 $\mu$ m ampR <i>URA3</i> gRNA- <i>NQM1</i>                     | 12569                   | This study                    |
| <b>pUDR354</b>               | 2 $\mu$ m ampR <i>URA3</i> gRNA- <i>PYC2</i> gRNA- <i>SDH1b</i>  | 12514 & 12521           | This study                    |
| <b>pUDR355</b>               | 2 $\mu$ m ampR <i>amdSYM</i> gRNA- <i>SHH3</i> gRNA- <i>SHH4</i> | 9446 & 12529            | This study                    |
| <b>pUDR376</b>               | 2 $\mu$ m ampR <i>amdSYM</i> gRNA-X2 (2x)                        | N.A.                    | (Wronska <i>et al.</i> 2020)  |
| <b>pUDR458</b>               | 2 $\mu$ m ampR <i>URA3</i> gRNA- <i>AAC1</i> gRNA- <i>AAC3</i>   | 13820 & 13826           | This study                    |
| <b>pUDR460</b>               | 2 $\mu$ m ampR <i>amdSYM</i> gRNA- <i>CTP1</i> gRNA- <i>NDT2</i> | 9489 & 13853            | This study                    |
| <b>pUDR462</b>               | 2 $\mu$ m ampR <i>amdSYM</i> gRNA- <i>SAL1</i> gRNA- <i>MPC3</i> | 13830 & 13859           | This study                    |
| <b>pUDR606</b>               | 2 $\mu$ m ampR <i>amdSYM</i> gRNA- <i>ODC1</i> gRNA- <i>ODC2</i> | 13840 & 15580           | This study                    |
| <b>pUDR686</b>               | 2 $\mu$ m ampR <i>URA3</i> gRNA- <i>ODC1</i> gRNA- <i>CTP1</i>   | 13840 & 9489            | This study                    |
| <b>pUDR687</b>               | 2 $\mu$ m ampR <i>amdSYM</i> gRNA- <i>NDT2</i> (2x)              | 13853                   | This study                    |
| <b>pUDR688</b>               | 2 $\mu$ m ampR <i>amdSYM</i> gRNA- <i>ODC2</i> (2x)              | 13846                   | This study                    |
| <b>pUDR722</b>               | 2 $\mu$ m ampR <i>amdSYM</i> gRNA- <i>FRDS1</i> (2x)             | 17280                   | This study                    |
| <b>pUDR723</b>               | 2 $\mu$ m ampR <i>URA3</i> gRNA- <i>IDP1</i> (2x)                | 12285                   | This study                    |
| <b>pUDR724</b>               | 2 $\mu$ m ampR <i>URA3</i> gRNA- <i>IDP2</i> (2x)                | 17287                   | This study                    |
| <b>pUDR725</b>               | 2 $\mu$ m ampR <i>URA3</i> gRNA- <i>IDP1</i> gRNA- <i>IDP2</i>   | 12285 & 17287           | This study                    |
| <b>pUDR738</b>               | 2 $\mu$ m ampR <i>URA3</i> gRNA- <i>CTP1</i> (2x)                | 9489                    | This study                    |
| <b>pUDR739</b>               | 2 $\mu$ m ampR <i>URA3</i> gRNA- <i>ALD3</i> (2x)                | 17446                   | This study                    |
| <b>pUDR740</b>               | 2 $\mu$ m ampR <i>amdSYM</i> gRNA- <i>GPD1</i> gRNA- <i>GPP2</i> | 9498                    | This study                    |
| <b>pUDR741</b>               | 2 $\mu$ m ampR <i>URA3</i> gRNA- <i>GPD1</i> gRNA- <i>ALD3</i>   | 7772 & 17446            | This study                    |
| <b>pUDR742</b>               | 2 $\mu$ m ampR <i>URA3</i> gRNA- <i>GPP2</i> gRNA- <i>ALD3</i>   | 9498 & 17446            | This study                    |

DiCarlo JE, Norville JE, Mali P *et al.* Genome engineering in *Saccharomyces cerevisiae* using CRISPR-Cas systems. *Nucleic Acids Res* 2013;41: 4336-43.

Mans R, van Rossum HM, Wijsman M et al. CRISPR/Cas9: a molecular Swiss army knife for simultaneous introduction of multiple genetic modifications in *Saccharomyces cerevisiae*. FEMS Yeast Res 2015;15: 1-15.

Wronska AK, Haak MP, Geraats E et al. Exploiting the diversity of *Saccharomycotina* yeasts to engineer biotin-independent growth of *Saccharomyces cerevisiae*. Appl Environ Microbiol 2020;86.

de Kok S, Nijkamp JF, Oud B et al. Laboratory evolution of new lactate transporter genes in a *jen1Δ* mutant of *Saccharomyces cerevisiae* and their identification as *ADY2* alleles by whole-genome resequencing and transcriptome analysis. FEMS Yeast Res 2012;12: 359-74.

Güldener U, Heck S, Fielder T et al. A new efficient gene disruption cassette for repeated use in budding yeast. Nucleic Acids Res 1996;24: 2519-24.
