# Supplementary material for: Top-Down, Knowledge-Based Genetic Reduction of Yeast Central Carbon Metabolism
Source: PubMed Central journal article supplement (PMC9600970; doi:10.1128/mbio.02970-21), 2022-09-21
Supplement: mbio.02970-21-s0008.pdf [file mbio.02970-21-s0008.pdf]

Table S5 - List of primers

| Primer name                                                   | Primer number | Sequence (5' to 3')                                                                                                                       |
|---------------------------------------------------------------|---------------|-------------------------------------------------------------------------------------------------------------------------------------------|
| <b>A. pROS/pMEL gRNA primers. gRNA sequence is underlined</b> |               |                                                                                                                                           |
| 2mu inside fw                                                 | 5974          | TACTTTTGAGCAATGTTTGTGGA                                                                                                                   |
| 2mu inside rv                                                 | 5975          | AACGAGCTACTAAAATATTGCGAA                                                                                                                  |
| Primer_gRNA_426_fw                                            | 5979          | TATTGACGCCGGGCAAGAGC                                                                                                                      |
| Primer_stRNA_426_rv                                           | 5980          | CGACCGAGTTGCTCTTG                                                                                                                         |
| P426 CRISPR rv                                                | 6005          | GATCATTTATCTTTCACTGCGGAGAAG                                                                                                               |
| RV_gnd2_gRNA                                                  | 7231          | GTTGATAACGGACTAGCCTTATTTAACTTGCTATTTCTAGCT<br>CTAAAACATGATCTGGCAGCTTCGCGGATCATTTATCTTTCA<br>CTGCGGAGAAGTTTCGAACGCCGAAACATGCGCA            |
| SOL4_targetRNA FW                                             | 9503          | TGCGCATGTTTCGGCGTTCGAAACTTCTCCGCAGTGAAAGAT<br>AAATGATC <u>ACATTTTTCCACATATTAAG</u> GTTTTAGAGCTAGA<br>AATAGCAAGTAAAATAAG                   |
| TKL2_targetRNA FW                                             | 9508          | TGCGCATGTTTCGGCGTTCGAAACTTCTCCGCAGTGAAAGAT<br>AAATGATC <u>TCAAAA</u> ACTTAATGAGGAATGTTTTAGAGCTAGA<br>AATAGCAAGTAAAATAAG                   |
| SHH3_gRNA fw                                                  | 9446          | TGCGCATGTTTCGGCGTTCGAAACTTCTCCGCAGTGAAAGAT<br>AAATGATC <u>ATCCGGTTTTTATAACCCC</u> AGTTTTAGAGCTAGA<br>AATAGCAAGTAAAATAAGGCTAGTCCGTTATCAAC  |
| CTP1_targetRNA FW                                             | 9489          | TGCGCATGTTTCGGCGTTCGAAACTTCTCCGCAGTGAAAGAT<br>AAATGATC <u>ACACCAAAA</u> ATACCATAATAAGTTTTAGAGCTAGA<br>AATAGCAAGTAAAATAAGGCTAGTCCGTTATCAAC |
| GPP2_targetRNA FW                                             | 9498          | TGCGCATGTTTCGGCGTTCGAAACTTCTCCGCAGTGAAAGAT<br>AAATGATC <u>CCAGA</u> ACCATATTTGAAAGGC GTTTTTAGAGCTAGA<br>AATAGCAAGTAAAATAAG                |
| gRNA_IDP1_fwd                                                 | 12285         | TGCGCATGTTTCGGCGTTCGAAACTTCTCCGCAGTGAAAGAT<br>AAATGATC <u>GATCTTATCCCAA</u> ATGATACGTTTTAGAGCTAGA<br>AATAGCAAGTAAAATAAGGCTAGTCCGTTATCAAC  |
| PYC2_targetRNA fw                                             | 12514         | TGCGCATGTTTCGGCGTTCGAAACTTCTCCGCAGTGAAAGAT<br>AAATGATC <u>CGTGACTTAAATAAGAAA</u> ACTGTTTTAGAGCTAGA<br>AATAGCAAGTAAAATAAGGCTAGTCCGTTATCAAC |
| SDH1b_targetRNA fw                                            | 12521         | TGCGCATGTTTCGGCGTTCGAAACTTCTCCGCAGTGAAAGAT<br>AAATGATC <u>TTTCTGATAAGTCAATGATCG</u> TTTTAGAGCTAGA<br>AATAGCAAGTAAAATAAGGCTAGTCCGTTATCAAC  |
| SHH4_targetRNA fw                                             | 12529         | TGCGCATGTTTCGGCGTTCGAAACTTCTCCGCAGTGAAAGAT<br>AAATGATC <u>CATATAAGAGGAATCATTTGG</u> TTTTAGAGCTAGA<br>AATAGCAAGTAAAATAAGGCTAGTCCGTTATCAAC  |
| CIT3_targetRNA rv                                             | 12537         | GTTGATAACGGACTAGCCTTATTTAACTTGCTATTTCTAGCT<br>CTAAAAC <u>CATTTGTAATGTT</u> CGAATAAGATCATTTATCTTTCA<br>CTGCGGAGAAGTTTCGAACGCCGAAACATGCGCA  |

|                           |       |                                                                                                                                 |
|---------------------------|-------|---------------------------------------------------------------------------------------------------------------------------------|
| <b>NQM1_targetRNA RV</b>  | 12569 | GTTGATAACGGACTAGCCTTATTTAACTTGCTATTTCTAGCT<br>CTAAAACCTAGAACAGTTATATGAATGATCATTTATCTTTCA<br>CTGCGGAGAAGTTTTCGAACGCCGAAACATGCGCA |
| <b>AAC1_targetRNA FW</b>  | 13820 | TGCGCATGTTTCGGCGTTCGAACTTCTCCGCAGTGAAAGAT<br>AAATGATCGTATAAGAAGACACTGAAAAGTTTTAGAGCTAG<br>AAATAGCAAGTAAAATAAGGCTAGTCCGTTATCAAC  |
| <b>AAC3_targetRNA FW</b>  | 13826 | TGCGCATGTTTCGGCGTTCGAACTTCTCCGCAGTGAAAGAT<br>AAATGATCTTATAAAAAGACCTTGAAATGTTTTAGAGCTAGA<br>AATAGCAAGTAAAATAAGGCTAGTCCGTTATCAAC  |
| <b>SAL1_targetRNA FW</b>  | 13830 | TGCGCATGTTTCGGCGTTCGAACTTCTCCGCAGTGAAAGAT<br>AAATGATCTTGGCATTAAACGAAATAAATGTTTTAGAGCTAGA<br>AATAGCAAGTAAAATAAGGCTAGTCCGTTATCAAC |
| <b>ODC1_targetRNA FW</b>  | 13840 | TGCGCATGTTTCGGCGTTCGAACTTCTCCGCAGTGAAAGAT<br>AAATGATCAAGAATAGTGTTGTGAAAGGGTTTTAGAGCTAG<br>AAATAGCAAGTAAAATAAGGCTAGTCCGTTATCAAC  |
| <b>ODC2_targetRNA FW</b>  | 13846 | TGCGCATGTTTCGGCGTTCGAACTTCTCCGCAGTGAAAGAT<br>AAATGATCGTGCTGTTAAAAAATACAACGTTTTAGAGCTAGA<br>AATAGCAAGTAAAATAAGGCTAGTCCGTTATCAAC  |
| <b>ODC2_targetRNA_fw</b>  | 15580 | TGCGCATGTTTCGGCGTTCGAACTTCTCCGCAGTGAAAGAT<br>AAATGATCTTTTTCAGGGATCTGAAGTAGTTTTAGAGCTAGA<br>AATAGCAAGTAAAATAAGGCTAGTCCGTTATCAAC  |
| <b>NDT2_targetRNA FW</b>  | 13853 | TGCGCATGTTTCGGCGTTCGAACTTCTCCGCAGTGAAAGAT<br>AAATGATCGAAAATTTAAAAATAAGGTTGTTTTAGAGCTAGA<br>AATAGCAAGTAAAATAAGGCTAGTCCGTTATCAAC  |
| <b>MPC3_targetRNA FW</b>  | 13859 | TGCGCATGTTTCGGCGTTCGAACTTCTCCGCAGTGAAAGAT<br>AAATGATCTTATTCACTACATAATAAAAGTTTTAGAGCTAGA<br>AATAGCAAGTAAAATAAGGCTAGTCCGTTATCAAC  |
| <b>FRDS1_targetRNA FW</b> | 17280 | TGCGCATGTTTCGGCGTTCGAACTTCTCCGCAGTGAAAGAT<br>AAATGATCTAAAGGTGTCCAAGAATTAAGTTTTAGAGCTAGA<br>AATAGCAAGTAAAATAAGGCTAGTCCGTTATCAAC  |
| <b>IDP1_targetRNA FW</b>  | 12285 | TGCGCATGTTTCGGCGTTCGAACTTCTCCGCAGTGAAAGAT<br>AAATGATCGATCTTATCCCAAATGATACGTTTTAGAGCTAGA<br>AATAGCAAGTAAAATAAGGCTAGTCCGTTATCAAC  |
| <b>IDP2_targetRNA FW</b>  | 17287 | TGCGCATGTTTCGGCGTTCGAACTTCTCCGCAGTGAAAGAT<br>AAATGATCATGAGCAAACAAGAATAATCGTTTTAGAGCTAG<br>AAATAGCAAGTAAAATAAGGCTAGTCCGTTATCAAC  |
| <b>ALD3_targetRNA FW</b>  | 17446 | TGCGCATGTTTCGGCGTTCGAACTTCTCCGCAGTGAAAGAT<br>AAATGATCAACTTTAGCTTCTTCTTGATGTTTTAGAGCTAGAA<br>ATAGCAAGTAAAATAAGGCTAGTCCGTTATCAAC  |
| <b>GPD1_targetRNA FW</b>  | 7772  | TGCGCATGTTTCGGCGTTCGAACTTCTCCGCAGTGAAAGAT<br>AAATGATCATTCTTCAATCATGTCCGGCGTTTTAGAGCTAGA<br>AATAGCAAGTAAAATAAG                   |

## B. Confirmation of guide RNA plasmids

|                     |      |                      |
|---------------------|------|----------------------|
| <b>FK105-MP1</b>    | 2528 | TCTTTCCTGCGTTATCCC   |
| <b>Fus Tag B fw</b> | 4672 | CACCTTTCGAGAGGACGATG |
| <b>LP crRNA rv</b>  | 5941 | GCTGGCCTTTTGCTCACATG |

|                                   |       |                           |
|-----------------------------------|-------|---------------------------|
| <b>RV_gnd2_gRNA_check</b>         | 7257  | TATGATCTGGCAGCTTCGCG      |
| <b>TKL2_beta_dg rv</b>            | 9708  | ATTCCTCATTAAGTTTTTGA      |
| <b>SOL4_alpha_dg rv</b>           | 9709  | CTTAATATGTGGAAAAATGT      |
| <b>GPP2_beta_dg rv</b>            | 9710  | GCCTTTCAAATATGGTTCTG      |
| <b>TEFterm Fw</b>                 | 9719  | TCAAGAACTTGTCATTTGTATAG   |
| <b>p426_AmdS_origin_removal_2</b> | 10466 | GGAAATGTGCGCGGAAC         |
| <b>fw_CYC1t</b>                   | 11787 | TCATGTAATTAGTTATGTCACGC   |
| <b>PYC2_pROS_dg rv</b>            | 12520 | AGTTTTCTTATTTAAGTCAC      |
| <b>SDH1b_pROS_dg rv</b>           | 12527 | GATCATTGACTTATCAGAAA      |
| <b>SHH3_pROS_dg rv</b>            | 12528 | TGGGGTTATAAAAAACCGGAT     |
| <b>SHH4_pROS_dg rv</b>            | 12535 | CAAATGATTCCTCTTATATG      |
| <b>CIT3_pMEL_dg rv</b>            | 12542 | TTATTCGAACATTACAAATG      |
| <b>NQM1_pMEL_dg fw</b>            | 12729 | ATTCATATAACTGTTCTAGA      |
| <b>AAC1_pROS_dg rv</b>            | 13825 | TTTTCAGTGTCTTCTTATAC      |
| <b>AAC3_pROS_dg rv</b>            | 13829 | ATTTCAAGGTCTTTTTATAA      |
| <b>SAL1_pROS_dg rv</b>            | 13835 | ATTTATTTTCGTTAATGCCAA     |
| <b>ODC1_pROS_dg rv</b>            | 13845 | CCTTTCACAACACTATTCTT      |
| <b>ODC2_pROS_dg rv</b>            | 13851 | GTTGTATTTTTTAACAGCAC      |
| <b>CTP1_pROS_dg rv</b>            | 13852 | TTATTATGGTATTTTGGTGT      |
| <b>NDT2_pROS_dg rv</b>            | 13858 | AACCTTATTTTTAAATTTTC      |
| <b>MPC3_pMEL_dg fw</b>            | 13864 | TTATTCACTACATAATAAAA      |
| <b>FRDS1_pROS_dg rv</b>           | 17285 | CTTAATCTTGGACACCTTTAGATC  |
| <b>IDP1_pROS_dg rv</b>            | 17286 | CGTATCATTTGGGATAAGATCGATC |
| <b>IDP2_pROS_dg rv</b>            | 17290 | CGATTATTCTTGTTTGCTCATGATC |
| <b>GPD1_pROS_dg rv</b>            | 17443 | TATGGTCGACGTCCTTGCCC      |
| <b>ALD3_pROS_dg rv</b>            | 17447 | CATCAAGAAGAAGCTAAAGTTGATC |

### C. List of primers used for making repair fragments for gene deletion or integration

|                             |      |                                                                                                                                  |
|-----------------------------|------|----------------------------------------------------------------------------------------------------------------------------------|
| <b>OAC1_KO_fw</b>           | 6358 | ATAGCAAGTCAGACACAAGCACATCTCATCGAATTATATCGT<br>AAGCAAATGCCAGCTGAAGCTTCGTACG                                                       |
| <b>OAC1_KO_rv</b>           | 6359 | CTGGCCAATGAATGAAACTTCAAACCTCGGAGTTTGTATGG<br>GAATTAATGCATAGGCCACTAGTGGATCTG                                                      |
| <b>Gnd2_repair_FW_new</b>   | 7299 | AAGAATTCGTAGGTGCAGGTGAGCATATTGCCGGATAAGTG<br>TAGTTACGCAACTACAATTGTTACTAAGGCCCAATCCGGTTG<br>GAGAAGAACTATTGCCCTTGCTGCTACTTACGGTATT |
| <b>Gnd2_repair_RV_new</b>   | 7300 | AATACCGTAAGTAGCAGCAAGGGCAATAGTTCTTCTCCAACC<br>GGATTGGGCCTTAGTAACAATTGTAGTTGCGTAACTACACTT<br>ATCCGGCAATATGCTCACCTGCACCTACGAATTCTT |
| <b>SHH3 repair oligo fw</b> | 9448 | CTCAATGCGACTGTGATAGCTGATAAGTGGAGCTCAGAAAT<br>ATTCAGAAGCGTAAGAATAATGAAATGTAAGGAATGTA<br>AGTGTTTTTGGCTACATAGCTTTTATGATACTCTTTAT    |
| <b>SHH3 repair oligo rv</b> | 9449 | ATAAAGAGTATCATAAAAGCTATGTAGCAAAAAACACTAAG<br>TACATTCCTTACATTTTATTATTCTTACGCTTCTGAATTTCT<br>GAGCTCCACTTATCAGCTATCACAGTCGCATTGAG   |
| <b>CTP1_repair oligo fw</b> | 9491 | TTGATGTCACAATGAAAGAACTCCAAAGTAGAGCTTGAATTA<br>TAAATTAGCATTTTACCGAATGTATTATTGTGTACAATATATC<br>ATCTAATGTTTTCTACTCGTTATAAGTCTATTTAC |

|                               |       |                                                                                                                                   |
|-------------------------------|-------|-----------------------------------------------------------------------------------------------------------------------------------|
| <b>CTP1_repair oligo rv</b>   | 9492  | GTAAATAGACTTATAACGAGTAGAAAACATTAGATGATATAT<br>TGTACACAATAATACATTTCGGTAAAATGCTAATTTATAATTCA<br>AGCTCTACTTTGGAGTCTTTTCATTGTGACATCAA |
| <b>GPP2_repair oligo fw</b>   | 9499  | GTTTGCCAAAGGTTTCTTTCTGCTCAATTTGGTCTAACTCTTT<br>TCATATTAATAGCGCCATTAATAAATACGTAGATAGATTTTT<br>TTTTTAAAACATATAGTGTGCTATTATTTCTG     |
| <b>GPP2_repair oligo rv</b>   | 9500  | CAGAAATAATAGCACACTATATGTTTTAAAAAAAAAAATCTA<br>TCTACGTATTTATTTAATGGCGCTATTAATATGAAAAGAGTTA<br>GACCAAATTGAGCAGAAAAGAAACCTTTGGCAAAC  |
| <b>SOL4_repair oligo fw</b>   | 9504  | CAGCAGTTTTCCAAACAAGAATGCCATTCATCAAATAATCC<br>ACAACCACCTCAAGAAAATTACACTCGTCTTTATACGAAACT<br>GGCTCCGTTAATCACGACAGACAACCTTAATTACAT   |
| <b>SOL4_repair oligo rv</b>   | 9505  | ATGTAATTAAGTTGTCTGTCGTGATTAACGGAGCCAGTTTC<br>GTATAAGACGAGTGAATTTTCTTGAGGTGGTTGTGGATTA<br>TTTGATGAATGGCATTCTTTGTTTGGAAAACCTGCTG    |
| <b>TKL2_repair oligo fw</b>   | 9509  | TTGTTGGGAGGAGTCTGAATAAGGAGTGTCAATATAGGG<br>AGCTTCATTCGTTGTCAAGGAAGTAAACAGTCTTTGCTATTT<br>CACACTTCTGGTTGATGGTCACTTGCTGCCTGAAA      |
| <b>TKL2_repair oligo rv</b>   | 9510  | TTTCAGGCAGCAAGTGACCATCAACCAGGAAGTGTGAAATA<br>GCAAAGAAGTGTACTTCTTGACAACGAATGAAGCTCCCT<br>ATATTCGACACTCCTTATTCAGGACTCCTCCCAACAA     |
| <b>IDP1_repair_fwd</b>        | 12295 | TTATGAAATCTTCTTCAAGCAATTGTGAGACAACAGACGCA<br>CAAGGAAGATCGCCAGCTCGAATTTACGTAGCCCAATCTAC<br>CACTTTTTTTTTCATTTTTTAAAGTGTATACTTAG     |
| <b>IDP1_repair_rev</b>        | 12296 | CTAAGTATAACACTTTAAAAAATGAAAAAAAAAAGTGGTAGA<br>TTGGGCTACGTAAATTCGAGCTGGGCGATCTTCTTGTGCGT<br>CTGTTGTCTCACAATTGCTTGAAGGAAGATTTTCATAA |
| <b>PYC2-repair oligo fw</b>   | 12516 | TGCAAAATAAAGGACAGTTACTAGGAGAGAAAATAAGGGA<br>CATAGAGAACAATAAAATTTTTACTCGTTAATTATATTTTT<br>ATGACATCTGAAAATACTAGCTGTACTATATATGGCG    |
| <b>PYC2-repair oligo rv</b>   | 12517 | CGCCATATATAGTACAGCTAGTATTTTCAGATGTCATAAAAT<br>ATAATTAACGAGTAAAAAATTTACTTTGTTCTCTATGTCTCT<br>TATTTTCTCTCCTAGTAACTGCCTTTATTTTGGCA   |
| <b>SDH1b -repair oligo fw</b> | 12523 | GAAAAGAAGGAGCCTAAATACGTATATCTATATACATGTATA<br>CACGTGAGCTAATAAATTTTCTTATTTATTTATTTATTTT<br>GGAGGGCAAACCTATTTATTGATCTGGCAAAAAT      |
| <b>SDH1b -repair oligo rv</b> | 12524 | ATTTTTGCCAGATCAATAAATAAGTTTGCCTCCAAAATAAAT<br>AAATAAATAAATAAGAAAATTTATTAGCTCACGTGTATACAT<br>GTATATAGATATACGTATTTAGGCTCCTTCTTTTC   |
| <b>SHH4-repair oligo fw</b>   | 12531 | AGTTCTAATGAATCAGCAAAGATTCTCAAAAAGGTTGCCCA<br>ATTCTTAGGAAAGTAGGATCAATATGGTTTGGTTAGTGGTGA<br>CTACCTTTTTTATTCTCGTTATATATGTGTATTAGA   |
| <b>SHH4-repair oligo rv</b>   | 12532 | TCTAATACACATATATAACGAGAATAAAAAAGGTAGTCACCA<br>CTAACCAAACCATATTGATCCTACTTTCCTAAGAATTGGGGC<br>AACCTTTTTGAGAATCTTTGCTGATTCATTAGAACT  |
| <b>CIT3-repair oligo fw</b>   | 12538 | AAAAAGATCGTATTTGATCAAGAATTTATACATAGACGCCGC<br>TAAATAATTGAATACAAACGCAGTTCCAATTTACAAGAATGC<br>TTCGTTTGTATTACAATATTGAAATATAAATAAAA   |

|                             |       |                                                                                                                                    |
|-----------------------------|-------|------------------------------------------------------------------------------------------------------------------------------------|
| <b>CIT3-repair oligo rv</b> | 12539 | TTTTATTTATATTTCAATATTGTAATAGCAAACGAAGCATTCT<br>TGTA AATTGGA ACTGCGTTTGTATTCAATTATTTAGCGGCGT<br>CTATGTATAAATTCTTGATCAAATACGATCTTTTT |
| <b>NQM1_repair oligo fw</b> | 12570 | TTCTTGCTAGCGTAAGTCATAAAAAATAGGAAATAATCACAT<br>ATATACAAGAAATTAATTCATTAAGAGTAGAGGTACCTACT<br>TATATATATAAATATATATATACCACCTTTCCTTTTT   |
| <b>NQM1_repair oligo rv</b> | 12571 | GAAAAGGAAAGTGGTATATATATATTTATATATATAAGTAGG<br>TACCTCTACTCTTAATGAATTAATTTCTTGATATATGTGATT<br>ATTTCTATTTTTATGACTTACGCTAGCAAGAA       |
| <b>AAC1_repair oligo fw</b> | 13821 | TTCTTTTTACAGCAGTAATGTCTCACACAGAAACATAGACTC<br>AGCAGTCACACTTCGGTAAAAAAAAGAAAAACAACAAACGAA<br>TAAATCTAAAAATCTACATATTCTTGCTATTTAT     |
| <b>AAC1_repair oligo rv</b> | 13822 | ATAAATAGCAAGAATATGTAGAATTTTAGATTTTATTCGTTT<br>GTTGTTTTCTTTTTTACC GAAGTGACTGCTGAGTCTATG<br>TTTCTGTGTGAGACATTACTGCTGTAAAAAGGAA       |
| <b>AAC3_repair oligo fw</b> | 13827 | GTATAATTA ACTCAATTGAAGACGGTTTACCTGAAGTGATAT<br>ACTGTGCCTTGAGAAACATCAGTTGGATGAAGAAAAAGTC<br>ATTTTCTCGACTTCTCTTACCTTTTCGATCGATTGA    |
| <b>AAC3_repair oligo rv</b> | 13828 | TCAAATCGATCGAAAGGTGAAGAGAAGTCGAGAAAATGACT<br>TTTTTCTCATCCA ACTGATGTTTCTCAAGGCACAGTATATCA<br>CTTCAGGTAAACCGTCTTCAATTGAGTTAATTATAC   |
| <b>SAL1_repair oligo fw</b> | 13831 | GGGAAATATTGAATATTGAAGGGGCAAATAACGTTTAATTC<br>AATCGAATGACGGTCTAATGATAATAACATATGCATATGTAT<br>CAACTAGTGAATTCTATTTAATTATAAACCGCTGCT    |
| <b>SAL1_repair oligo rv</b> | 13832 | AGCAGCGGTTTATAATTAATAGAATTCAGTGTGATACAT<br>ATGCATATGTTATTATCATTAGACCGTCATTCGATTGAATTAA<br>ACGTTATTTGCCCTTCAAATATTCAATATTTCCC       |
| <b>ODC1_repair oligo fw</b> | 13841 | TTTATCTCATTATTCTCAAGATAGA ACTGTAACGAGGGTGA<br>AAGAAAAAGAACTGTAAGTCTGACGCTCTTTATTTCATTTT<br>GTTGTAGCCCGCCATACATGTATACGTATATATAT     |
| <b>ODC1_repair oligo rv</b> | 13842 | ATATATATACGTATACATGTATGGGCGGGCTACAACAAAATG<br>AAATAAAGAGCGTCAGGACTTACAGTTCTTTTTCTTCCACCT<br>CGTTACAGTTCTATCTTGAGAATAAATGAGATAAA    |
| <b>ODC2_repair oligo fw</b> | 13847 | CACTTTTTACTGGGTTAGATTCTATATAGTCAAGTAATTCGA<br>GGTAGCATCAAAGTAATTATTTATTGTATATAGAATACCTCTT<br>TCCTCTTCAATCTTAACTACGTTATTTCTACGTC    |
| <b>ODC2_repair oligo rv</b> | 13848 | GACGTAGAAATAACGTAGTTAAGATTGAAGAGGAAAGAGG<br>TATTCTATATACAATAAATAATTACTTTGATGCTACCTCGAAT<br>TACTTGACTATATAGAATCTAACCCAGTAAAAAAGTG   |
| <b>NDT2_repair oligo fw</b> | 13854 | GTTGTTCTCAACTATTTTCATTGTTTGATGAAAAGCGGAATA<br>TACATCACGGCTATATAAGTGAAACAGAAAAATGTACATGAC<br>ACAAGCTGAGGGTCGTAAAAAGCATCTTTCGCAAT    |
| <b>NDT2_repair oligo rv</b> | 13855 | ATTGCGAAAGATGCTTTTTACGACCCTCAGCTTGTGTGTCATGT<br>ACATTTTTCTGTTTCACTTATATAGCCGTGATGTATATTCGGCT<br>TTTCATCAAACAATGAAAATAAGTTGAGAACAAC |
| <b>MPC3_repair oligo fw</b> | 13860 | GTCTTTAAGACTATACGCATAAGCATTCAAGACACATAGAAA<br>CACAAACCTATATTTTTATTACGTAAACGATAATATGTTCCCTG<br>AACTCGCATTTTTTAAATGATTTTTTATGACCTCT  |

|                              |       |                                                                                                                                    |
|------------------------------|-------|------------------------------------------------------------------------------------------------------------------------------------|
| <b>MPC3_repair oligo rv</b>  | 13861 | AGAGGTCATAAAAAATCATTAAAAAAATGCGAGTTCAGGAA<br>CATATTATCGTTTACGTAATAAAAAATATAGGTTTGTGTTTCTA<br>TGTGTCTTGAATGCTTATGCGTATAGTCTTAAAGAC  |
| <b>FRDS1_repair oligo fw</b> | 17281 | CATAGCACCCCATTTTTTTTTCTTATCTTCACTTCAACAACCCC<br>TCATCCGTAATTGTAAGGTGGTGTGCTAGAATCAATGTCAAGGC<br>TCAAGTCATTGGCAAGAACGACGAAAGGCTACTA |
| <b>FRDS1_repair oligo rv</b> | 17282 | TAGTAGCCTTTCGTCGTTCTTGCCAATGACTTGAGCCTTGACA<br>TTGATTCTAGCACCACTTACAATTACGGATGAGGGGTTGTT<br>GAAGTGAAGATAAGAAAAAATGGGGTGTATG        |
| <b>IDP2_repair oligo fw</b>  | 17288 | GCTGCTCAGGCACGAGAATAGGAGGTAAGAAGGTAACGTA<br>CGTATATATATAAAATCGTAACTAAAGATTTGGCGCTCATTCT<br>CGGTAAGTCTGAAAGATCCGCTTATGTTACTACCGAG   |
| <b>IDP2_repair oligo rv</b>  | 17289 | CTCGGTAGTAACATAAGCGGATCTTTCAGACTTACCGAGAAT<br>GAGCGCAAATCTTTAGTTACGATTTATATATATACGTACGT<br>TACCTTCTACCTCTATTCTCGTGCCTGAGCAGC       |
| <b>GPD1_repair oligo fw</b>  | 17444 | GAAACAATTGTATATTGTACACCCCCCCTCCACAAACACA<br>AATATTGATAATATAAAGATTTATTGGAGAAAGATAACATAT<br>CATACTTTCCCCACTTTTTTCGAGGCTCTTCTATA      |
| <b>GPD1_repair oligo rv</b>  | 17445 | TATAGAAGAGCCTCGAAAAAAGTGGGGGAAAGTATGATATG<br>TTATCTTCTCCAATAAATCTTTATATTATCAATATTTGTGTTT<br>GTGGAGGGGGGGGGTGTACAATATACAATTGTTTC    |
| <b>ALD3_repair oligo fw</b>  | 17450 | TGATTTTATTTGTAATAGTTATCAACGCCGGTGTGCGCTGAT<br>TCTCTACCAATACCACTTTTCTTTGGCTAATTTTCTAAATGT<br>GTATAATCTATATCTCTATGATACAAGTCCAAG      |
| <b>ALD3_repair oligo rv</b>  | 17451 | CTTGGACTTGTATCATAGAGATATAGATTATACACATTTAGA<br>AAATTAGCCAAAAGAAAAGTGGTATTGGTAGAGAATCAGG<br>CGACACCGGCGTTGATAACTATTTACAAATAAAATCA    |
| <b>GPP2_pURA3_fw</b>         | 17752 | AACCAGCTAGTGTGTACCAGATCAGTGGAAAAACATAAAAC<br>AATAAAAAACAATATTCGGATGAGTATTTCAATAAATTTGTA<br>GAGGACT                                 |
| <b>GPP2_tURA3_rv</b>         | 17753 | CGAATATAGAATAGGACTGTATCTGAGAATTACTTAAAT<br>ATGTTTCGATTTTAGAGGATTGCTTTTGTCCACTACTTTTTG                                              |
| <b>X2_pMPC3_fw</b>           | 18025 | TCACAGAGGGATCCCGTTACCCATCTATGCTGAAGATTTATC<br>ATACTATTCTCCGCTCGTTATTTGGTCGCCCTTTAAC                                                |
| <b>X2_tMPC3_rv</b>           | 18026 | GTCATAACTCAATTTGCCTATTTCTTACGGCTTCTCATAAAAC<br>GTCCACACTATTGAGGATCCTGCTGCTAAAAAGGTC                                                |

#### D. Verification of removal or insertion of a gene

|                           |      |                             |
|---------------------------|------|-----------------------------|
| <b>AAC3 - CTRL FW</b>     | 243  | GCTTCCAATGGCCTCCTCACCG      |
| <b>AAC3 - CTRL RV</b>     | 244  | GGGGGGGAATGCACTTAACAAAGAACC |
| <b>URA3_dg rev</b>        | 1065 | CCCGGTAAAGCATTTTGAAG        |
| <b>TKL2 dis500 fw</b>     | 1360 | TCTTAATGGTGGCTCGCTGTC       |
| <b>TKL2 dis500 rv</b>     | 1361 | TCAATGCAGCCCATACACTC        |
| <b>URA3_dg rev Inside</b> | 1741 | GAGCCCTTGCATGACAATTC        |
| <b>GPD1_dg fw</b>         | 2016 | CCCACCCACACCACCAATAC        |
| <b>GPD1_dg rev</b>        | 2017 | CGGACGCCAGATGCTAGAAG        |
| <b>URA3_dg fw Inside</b>  | 2891 | CATGGAGGGCACAGTTAAGC        |

|                    |       |                          |
|--------------------|-------|--------------------------|
| URA3_dg rev Insert | 4905  | TCTTGAAACGCTGCCCTAC      |
| OAC1_fw            | 6360  | AGTCAGGGTCTGCCGATATG     |
| OAC1_rv            | 6361  | CTTCCGGTCCATGTTTCGTC     |
| FW_gnd2KO_check    | 7258  | TCTGACAGGTGGCAGTTTCC     |
| RV_gnd2KO_check    | 7259  | ATCCGAAAGGCGGCAATAGG     |
| URA3_dg fw         | 7372  | GGGCAACGTTTCATCATCTCATGG |
| FW_x-2_outside     | 7376  | GGTCTAGGCCTGCATAATCG     |
| RV_X-2_outside     | 7377  | TGCGGCATCATGTCTACTTG     |
| SHH3_dg fw         | 9450  | GTGACATGGCTCTTGCGTTC     |
| SHH3_dg rv         | 9451  | ACTTGCATCGCATCCAGTTC     |
| CTP1_dg fw         | 9493  | TGTCTGGAACTCGGCTAAC      |
| CTP1_dg rv         | 9494  | TGGTTGGCTGTTTTGTGGC      |
| GPP2_dg fw         | 9501  | AGTGTCCGTCGCGTCATC       |
| GPP2_dg rv         | 9502  | GGCGTTACACAGCCCAATCC     |
| SOL4_dg fw         | 9506  | GGGTGGACGTTTAAGCATAAC    |
| SOL4_dg rv         | 9507  | GTATCACCGGGTGAGCTATG     |
| IDP1_dg fwd        | 12305 | GAGAACCCGAGGACGATGTC     |
| IDP1_dg_rev        | 12306 | AACAGCCCCCTAAAACACGG     |
| IDP2_dg_fwd        | 12307 | GTGGGTTCTCACCGGGTTAG     |
| IDP2_dg_rev        | 12308 | ACTACCAGCTGGGATAGGGG     |
| PYC2_dg fw         | 12518 | CTGTGATTGGCAGAGAGGGG     |
| PYC2_dg rv         | 12519 | AATTCGTTTGCGCCAAGTCC     |
| SDH1b_dg fw        | 12525 | CTCCGGACTTATGTGGCTCC     |
| SDH1b_dg rv        | 12526 | ACTGAGGGAGAGGGTAAGG      |
| SHH4_dg fw         | 12533 | GCGCACTAGTTTGATGCCTG     |
| SHH4_dg rv         | 12534 | TGGCCTGCAAATAAAAACGC     |
| CIT3_dg fw         | 12540 | AGTGACACACCATGGTAGCG     |
| CIT3_dg rv         | 12541 | GACATCGGGGAAGTGGCTAC     |
| NQM1_dg fw         | 12572 | CCTTGATCTGGCTCTGGCTC     |
| NQM1_dg rv         | 12573 | CGCAAGGTAATTACGCCACG     |
| AAC1_dg fw         | 13823 | TTATCGGCGACTCAGCGTAC     |
| AAC1_dg rv         | 13824 | TTTGAGAGAGCACCGTCCAC     |
| SAL1_dg fw         | 13833 | TACCGCCTTTCCAATACCC      |
| SAL1_dg rv         | 13834 | ATCTGGTTTGCGTTTCGCATC    |
| ODC1_dg fw         | 13843 | AATGCGGCGACCAGAGATAG     |
| ODC1_dg rv         | 13844 | CCCCAGTCAAGTTGCATTGC     |
| ODC2_dg fw         | 13849 | GTGCAGTCGCGATCACTTTC     |
| ODC2_dg rv         | 13850 | TCCCTGCGATCCGTTATGTG     |
| NDT2_dg fw         | 13856 | TTCTCGACATACTCGCGCTG     |
| NDT2_dg rv         | 13857 | CAGCTATTTCCGGCAGTGCAC    |
| MPC3_dg fw         | 13862 | TGGTTTGGTCACGAAAACC      |
| MPC3_dg rv         | 13863 | AAGTAGAAGAAGGCCGCGAC     |
| FRDS1_dg fw        | 17283 | TCGCAGGGTTTCTTACAGG      |
| FRDS1_dg rv        | 17284 | ACAATCTTCAGGCCCGTCTG     |
| ALD3_dg fw         | 17448 | GCTTAGCTTACATGGCTGCG     |
| ALD3_dg rv         | 17449 | TTTAGGGAGGAGACAGGGAG     |

## E. Construction and verification of IMX1331

| <b>Cas9 DNA fragment</b>                       |      |                                                                                        |
|------------------------------------------------|------|----------------------------------------------------------------------------------------|
| CAN1DelcassFW                                  | 2873 | TCAGACTTCTTAACTCCTGTAAAAACAAAAAAAAAAAAAAAAAGGC<br>ATAGCAATAAGCTGGAGCTCATAGCTTC         |
| A-CYC1t-rv                                     | 4653 | GTGCCTATTGATGATCTGGCGGAATGTCTGCCGTGCCATAGC<br>CATGCCTTCACATATAGTCCGCAAATTAAGCCTTCGAG   |
| <b>natNT2 DNA fragment</b>                     |      |                                                                                        |
| tagA-pUG                                       | 3093 | ACTATATGTGAAGGCATGGCTATGGCACGGCAGACATTCCG<br>CCAGATCATCAATAGGCACCTTCGTACGCTGCAGGTCGAC  |
| CAN1 KO rv                                     | 5542 | CTATGCTACAACATTCCAAAATTTGTCCCAAAAAGTCTTTGGT<br>TCATGATCTTCCCATACGCATAGGCCACTAGTGGATCTG |
| <b>Diagnostic primers to check integration</b> |      |                                                                                        |
| <b>CAN1 cut rv</b>                             | 5829 | AGAAGAGTGGTTGCGAACAGAG                                                                 |
| <b>m-PCR-HR4-RV</b>                            | 2673 | TGAAGTGGTACGGCGATGC                                                                    |
| <b>m-PCR-HR2-FW</b>                            | 2668 | ACGCGTGTACGCATGTAAC                                                                    |
| <b>Reverse primer pUGamds backbone</b>         | 8442 | CGGGTGACCCGGCGGGGAC                                                                    |
| <b>Nat Ctrl Fw</b>                             | 2620 | GCCGAGCAAATGCCTGCAAATC                                                                 |
| <b>Can1RV</b>                                  | 2615 | GAAATGGCGTGGGAATGTGA                                                                   |
