# Supplementary material for: Top-Down, Knowledge-Based Genetic Reduction of Yeast Central Carbon Metabolism
Source: PubMed Central journal article supplement (PMC9600970; doi:10.1128/mbio.02970-21), 2022-09-21
Supplement: mbio.02970-21-s0009.pdf [file mbio.02970-21-s0009.pdf]

Table S6 - Strain transformations

| Strain                      | Parental strain | Mutations                       | gRNA plasmid                                                   | Repair fragment                                                                                                          |
|-----------------------------|-----------------|---------------------------------|----------------------------------------------------------------|--------------------------------------------------------------------------------------------------------------------------|
| <b>Unreduced background</b> |                 |                                 |                                                                |                                                                                                                          |
| IMK588                      | CEN.PK113-7D    | <i>oac1Δ</i>                    | -                                                              | <i>KanMX</i> repair fragment                                                                                             |
| IMK815                      | IMX581          | <i>gnd2Δ tkl2Δ sol4Δ</i>        | pUDR286 ( <i>TKL2, SOL4</i> ) + pUDR287 ( <i>GND2</i> )        | <i>SOL4</i> : 9504 + 9505<br><i>TKL2</i> : 9509 + 9510<br><i>GND2</i> : 7299 + 7300                                      |
| IMX1592                     | IMK815          | <i>nqm1Δ</i>                    | pUDR353 ( <i>NQM1</i> )                                        | <i>NQM1</i> : 12570 + 12571                                                                                              |
| IMX1694                     | IMX581          | <i>pyc2Δ sdh1bΔ shh3Δ shh4Δ</i> | pUDR354 ( <i>PYC2, SDH1b</i> ) + pUDR355 ( <i>SHH3, SHH4</i> ) | <i>PYC2</i> : 12516 + 12517<br><i>SDH1b</i> : 12523 + 12524<br><i>SHH3</i> : 9448 + 9449<br><i>SHH4</i> : 12531 + 12532  |
| IMX1805                     | IMX1694         | <i>cit3Δ</i>                    | pUDR351                                                        | <i>CIT3</i> : 12538 + 12539                                                                                              |
| IMX2230                     | IMX581          | <i>odc1Δ odc2Δ ndt2Δ ctp1Δ</i>  | pUDR606 ( <i>ODC1, ODC2</i> )<br>pUDR460 ( <i>CTP1, NDT2</i> ) | <i>ODC1</i> : 13841 + 13842<br><i>ODC2</i> : 13847 + 13848<br><i>NDT2</i> : 13854 + 13855<br><i>CTP1</i> : 9491 + 9492   |
| IMX2360                     | IMX581          | <i>aac1Δ aac3Δ sal1Δ mpc3Δ</i>  | pUDR458 ( <i>AAC1, AAC3</i> )<br>pUDR462 ( <i>SAL1, MPC3</i> ) | <i>AAC1</i> : 13821 + 13822<br><i>AAC3</i> : 13827 + 13828<br><i>SAL1</i> : 13831 + 13832<br><i>MPC3</i> : 13860 + 13861 |
| IMX2391                     | IMX581          | <i>odc2Δ</i>                    | pUDR688 ( <i>ODC2</i> )                                        | <i>ODC2</i> : 13847 + 13848                                                                                              |
| IMX2396                     | IMX581          | <i>ctp1Δ odc1Δ odc2Δ</i>        | pUDR686 ( <i>ODC1, CTP1</i> )<br>pUDR688 ( <i>ODC2</i> )       | <i>ODC1</i> : 13841 + 13842<br><i>ODC2</i> : 13847 + 13848<br><i>CTP1</i> : 9491 + 9492                                  |
| IMX2397                     | IMX2360         | <i>odc2Δ</i>                    | pUDR688 ( <i>ODC2</i> )                                        | <i>ODC2</i> : 13847 + 13848                                                                                              |
| IMX2404                     | IMX581          | <i>ctp1Δ odc1Δ ndt2Δ</i>        | pUDR686 ( <i>ODC1, CTP1</i> )<br>pUDR687 ( <i>NDT2</i> )       | <i>ODC1</i> : 13841 + 13842<br><i>NDT2</i> : 13854 + 13855<br><i>CTP1</i> : 9491 + 9492                                  |
| IMX2408                     | IMX2360         | <i>ctp1Δ odc1Δ ndt2Δ</i>        | pUDR686 ( <i>ODC1, CTP1</i> )<br>pUDR687 ( <i>NDT2</i> )       | <i>ODC1</i> : 13841 + 13842<br><i>NDT2</i> : 13854 + 13855<br><i>CTP1</i> : 9491 + 9492                                  |
| IMX2416                     | IMX2360         | <i>ctp1Δ odc1Δ odc2Δ</i>        | pUDR686 ( <i>ODC1, CTP1</i> )<br>pUDR688 ( <i>ODC2</i> )       | <i>ODC1</i> : 13841 + 13842<br><i>ODC2</i> : 13847 + 13848<br><i>CTP1</i> : 9491 + 9492                                  |
| IMX2508                     | IMX581          | <i>ctp1Δ</i>                    | pUDR738 ( <i>CTP1</i> )                                        | <i>CTP1</i> : 9491 + 9492                                                                                                |
| IMX2527                     | IMX581          | <i>odc1Δ odc2Δ</i>              | pUDR606 ( <i>ODC1, ODC2</i> )                                  | <i>ODC1</i> : 13841 + 13842<br><i>ODC2</i> : 13847 + 13848                                                               |
| IMX2466                     | IMX581          | <i>frds1Δ</i>                   | pUDR722 ( <i>FRDS1</i> )                                       | <i>FRDS1</i> : 17281 + 17282                                                                                             |

|                           |         |                                 |                                                                   |                                                                                                                          |
|---------------------------|---------|---------------------------------|-------------------------------------------------------------------|--------------------------------------------------------------------------------------------------------------------------|
| <b>IMX2467</b>            | IMX581  | <i>idp1Δ</i>                    | pUDR723 ( <i>IDP1</i> )                                           | <i>IDP1</i> : 12295 + 12296                                                                                              |
| <b>IMX2468</b>            | IMX581  | <i>idp2Δ</i>                    | pUDR724 ( <i>IDP2</i> )                                           | <i>IDP2</i> : 17288 + 17289                                                                                              |
| <b>IMX2469</b>            | IMX581  | <i>idp1Δ idp2Δ</i>              | pUDR725 ( <i>IDP1, IDP2</i> )                                     | <i>IDP1</i> : 12295 + 12296<br><i>IDP2</i> : 17288 + 17289                                                               |
| <b>IMX2470</b>            | IMX581  | <i>frds1Δ idp1Δ idp2Δ</i>       | pUDR722 ( <i>FRDS1</i> )<br>pUDR725 ( <i>IDP1, IDP2</i> )         | <i>FRDS1</i> : 17281 + 17282<br><i>IDP1</i> : 12295 + 12296<br><i>IDP2</i> : 17288 + 17289                               |
| <b>IMX2509</b>            | IMX581  | <i>ald3Δ gpd1Δ gpp2Δ</i>        | pUDR739 ( <i>ALD3</i> )<br>pUDR740 ( <i>GPD1, GPP2</i> )          | <i>ALD3</i> : 17450 + 17451<br><i>GPD1</i> : 17444 + 17445<br><i>GPP2</i> : 9499 + 9500                                  |
| <b>IMX2510</b>            | IMX581  | <i>ald3Δ</i>                    | pUDR739 ( <i>ALD3</i> )                                           | <i>ALD3</i> : 17450 + 17451                                                                                              |
| <b>IMX2512</b>            | IMX581  | <i>ald3Δ gpd1Δ</i>              | pUDR741 ( <i>ALD3, GPD1</i> )                                     | <i>ALD3</i> : 17450 + 17451<br><i>GPD1</i> : 17444 + 17445                                                               |
| <b>IMX2513</b>            | IMX581  | <i>ald3Δ gpp2Δ</i>              | pUDR742 ( <i>ALD3, GPP2</i> )                                     | <i>ALD3</i> : 17450 + 17451<br><i>GPP2</i> : 9499 + 9500                                                                 |
| <b>IMX2612</b>            | IMX581  | <i>gpd1Δ gpp2Δ</i>              | pUDR740 ( <i>GPD1, GPP2</i> )                                     | <i>GPD1</i> : 17444 + 17445<br><i>GPP2</i> : 9499 + 9500                                                                 |
| <b>Reduced background</b> |         |                                 |                                                                   |                                                                                                                          |
| <b>IMK814</b>             | IMX1331 | <i>gnd2Δ tkl2Δ sol4Δ</i>        | pUDR286 ( <i>TKL2, SOL4</i> ) +<br>pUDR287 ( <i>GND2</i> )        | <i>SOL4</i> : 9504 + 9505<br><i>TKL2</i> : 9509 + 9510<br><i>GND2</i> : 7299 + 7300                                      |
| <b>IMX1591 (CCMin 1)</b>  | IMK815  | <i>nqm1Δ</i>                    | pUDR353 ( <i>NQM1</i> )                                           | <i>NQM1</i> : 12570 + 12571                                                                                              |
| <b>IMX1713</b>            | IMX1591 | <i>pyc2Δ sdh1bΔ shh3Δ shh4Δ</i> | pUDR354 ( <i>PYC2, SDH1b</i> ) +<br>pUDR355 ( <i>SHH3, SHH4</i> ) | <i>PYC2</i> : 12516 + 12517<br><i>SDH1b</i> : 12523 + 12524<br><i>SHH3</i> : 9448 + 9449<br><i>SHH4</i> : 12531 + 12532  |
| <b>IMX1806 (CCMin 2)</b>  | IMX1713 | <i>cit3Δ</i>                    | pUDR351                                                           | <i>CIT3</i> : 12538 + 12539                                                                                              |
| <b>IMX1984</b>            | IMX1806 | <i>aac1Δ aac3Δ sal1Δ mpc3Δ</i>  | pUDR458 ( <i>AAC1, AAC3</i> )<br>pUDR462 ( <i>SAL1, MPC3</i> )    | <i>AAC1</i> : 13821 + 13822<br><i>AAC3</i> : 13827 + 13828<br><i>SAL1</i> : 13831 + 13832<br><i>MPC3</i> : 13860 + 13861 |
| <b>IMX2231</b>            | IMX1984 | <i>odc1Δ odc2Δ ndt2Δ ctp1Δ</i>  | pUDR606 ( <i>ODC1, ODC2</i> )<br>pUDR460 ( <i>CTP1, NDT2</i> )    | <i>ODC1</i> : 13841 + 13842<br><i>ODC2</i> : 13847 + 13848<br><i>NDT2</i> : 13854 + 13855<br><i>CTP1</i> : 9491 + 9492   |
| <b>IMX2394</b>            | IMX1984 | <i>odc2Δ</i>                    | pUDR688 ( <i>ODC2</i> )                                           | <i>ODC2</i> : 13847 + 13848                                                                                              |
| <b>IMX2405</b>            | IMX1984 | <i>ctp1Δ odc1Δ</i>              | pUDR686 ( <i>ODC1, CTP1</i> )                                     | <i>ODC1</i> : 13841 + 13842<br><i>CTP1</i> : 9491 + 9492                                                                 |
| <b>IMX2406</b>            | IMX1984 | <i>ctp1Δ odc1Δ odc2Δ</i>        | pUDR686 ( <i>ODC1, CTP1</i> )<br>pUDR688 ( <i>ODC2</i> )          | <i>ODC1</i> : 13841 + 13842<br><i>ODC2</i> : 13847 + 13848<br><i>CTP1</i> : 9491 + 9492                                  |
| <b>IMX2407 (CCMin 3)</b>  | IMX1984 | <i>ctp1Δ odc1Δ ndt2Δ</i>        | pUDR686 ( <i>ODC1, CTP1</i> )<br>pUDR687 ( <i>NDT2</i> )          | <i>ODC1</i> : 13841 + 13842<br><i>NDT2</i> : 13854 + 13855<br><i>CTP1</i> : 9491 + 9492                                  |

|                                                 |         |                                  |                                                           |                                                                                            |
|-------------------------------------------------|---------|----------------------------------|-----------------------------------------------------------|--------------------------------------------------------------------------------------------|
| <b>IMX2471</b>                                  | IMX2407 | <i>frds1Δ</i>                    | pUDR722 ( <i>FRDS1</i> )                                  | <i>FRDS1</i> : 17281 + 17282                                                               |
| <b>IMX2472</b>                                  | IMX2407 | <i>idp1Δ</i>                     | pUDR723 ( <i>IDP1</i> )                                   | <i>IDP1</i> : 12295 + 12296                                                                |
| <b>IMX2473</b>                                  | IMX2407 | <i>idp2Δ</i>                     | pUDR724 ( <i>IDP2</i> )                                   | <i>IDP2</i> : 17288 + 17289                                                                |
| <b>IMX2474</b>                                  | IMX2407 | <i>idp1Δ idp2Δ</i>               | pUDR725 ( <i>IDP1, IDP2</i> )                             | <i>IDP1</i> : 12295 + 12296<br><i>IDP2</i> : 17288 + 17289                                 |
| <b>IMX2475<br/>(CCMin 4)</b>                    | IMX2407 | <i>frds1Δ idp1Δ<br/>idp2Δ</i>    | pUDR722 ( <i>FRDS1</i> )<br>pUDR725 ( <i>IDP1, IDP2</i> ) | <i>FRDS1</i> : 17281 + 17282<br><i>IDP1</i> : 12295 + 12296<br><i>IDP2</i> : 17288 + 17289 |
| <b>IMX2511</b>                                  | IMX2475 | <i>ald3Δ</i>                     | pUDR739 ( <i>ALD3</i> )                                   | <i>ALD3</i> : 17450 + 17451                                                                |
| <b>IMX2519<br/>(CCMin 5)</b>                    | IMX2475 | <i>ald3Δ gpd1Δ<br/>gpp2Δ</i>     | pUDR739 ( <i>ALD3</i> )<br>pUDR740 ( <i>GPD1, GPP2</i> )  | <i>ALD3</i> : 17450 + 17451<br><i>GPD1</i> : 17444 + 17445<br><i>GPP2</i> : 9499 + 9500    |
| <b>IMX2520</b>                                  | IMX2475 | <i>ald3Δ gpd1Δ</i>               | pUDR741 ( <i>ALD3, GPD1</i> )                             | <i>ALD3</i> : 17450 + 17451<br><i>GPD1</i> : 17444 + 17445                                 |
| <b>IMX2521</b>                                  | IMX2475 | <i>ald3Δ gpp2Δ</i>               | pUDR742 ( <i>ALD3, GPP2</i> )                             | <i>ALD3</i> : 17450 + 17451<br><i>GPP2</i> : 9499 + 9500                                   |
| <b>IMX2538<br/>(minimal<br/>CCM<br/>strain)</b> | IMX2520 | <i>gpp2Δ::URA3</i>               | -                                                         | <i>URA3</i> repair fragment                                                                |
| <b>IMX2640</b>                                  | IMX1984 | <i>X2::pMPC3-<br/>MPC3-tMPC3</i> | pUDR376 (X2)                                              | <i>MPC3</i> repair fragment                                                                |
| <b>IMX2641</b>                                  | IMX2519 | <i>X2::pMPC3-<br/>MPC3-tMPC3</i> | pUDR376 (X2)                                              | <i>MPC3</i> repair fragment                                                                |
